# Supplementary material for: IGF-1 and hyperglycaemia-induced FOXA1 and IGFBP-2 affect epithelial to mesenchymal transition in prostate epithelial cells
Source: PubMed Central journal article supplement (PMC7335671; doi:10.18632/oncotarget.27650), 2020-06-30
Supplement: oncotarget-11-2543-s001.pdf [file oncotarget-11-2543-s001.pdf]

# IGF-1 and hyperglycaemia-induced FOXA1 and IGFBP-2 affect epithelial to mesenchymal transition in prostate epithelial cells

## SUPPLEMENTARY MATERIALS

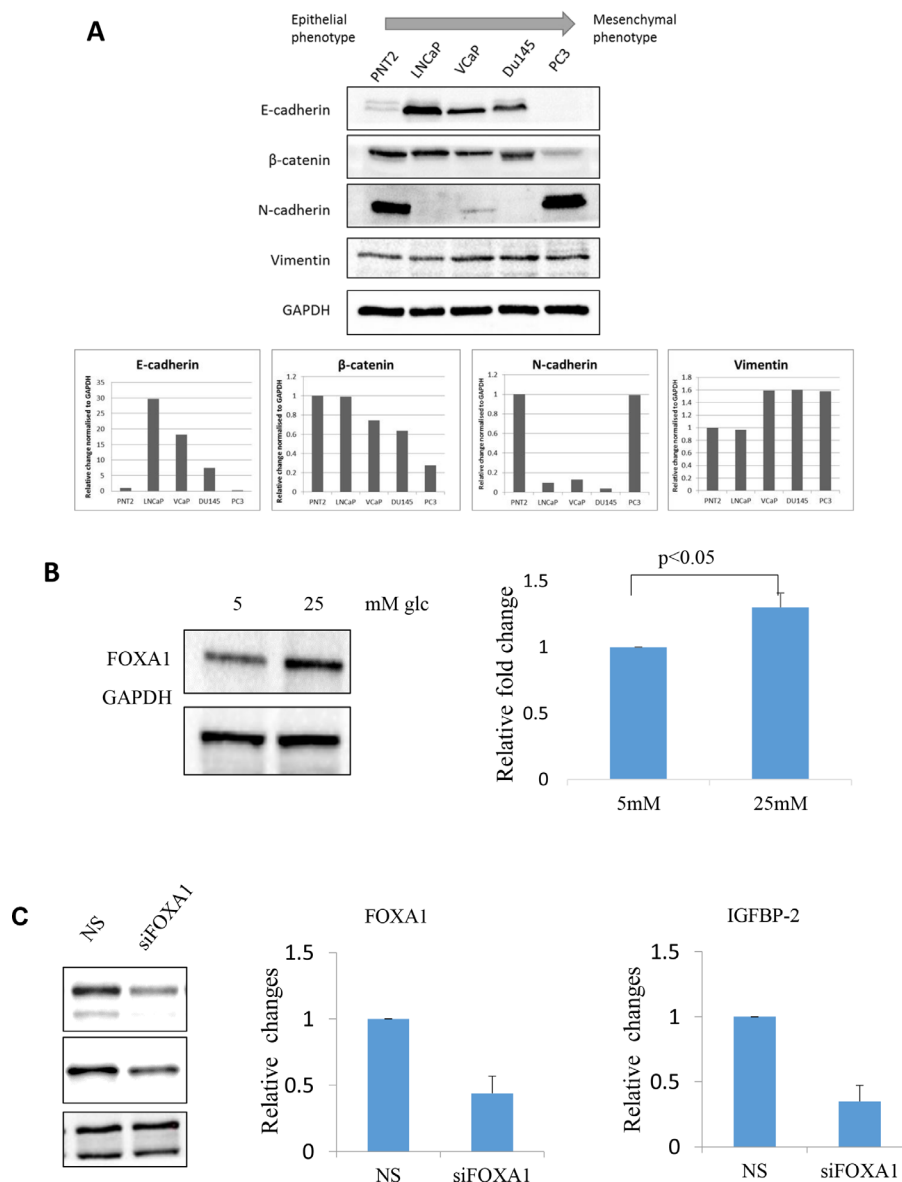

**Supplementary Figure 1:** (A) The differential levels of EMT markers in normal epithelial prostate cells and prostate cancer cell lines. Western blot showing E-cadherin, β-catenin, N-cadherin and vimentin protein levels in a panel of prostate cell lines. Prostate cell lines: PNT2, LNCaP, VCaP, DU145 and PC-3 cell lines were extracted as whole cell lysates after the cells were 80% confluence in the flask in 25 mM glucose-containing GM. Western blotting was performed to assess the abundance of the total amount of E-cadherin, β-catenin, N-cadherin and vimentin. GAPDH acted as a loading control. Quantified fold changes relative to PNT2 cells are shown in the graphs below. (B) Western blot image showing the effect of different glucose concentration on the level of FOXA1 in LNCaP cells. Optical densities of protein blots were quantitated using image J and normalised to GAPDH. Data are represented as mean ± SEM. (C) The effect of FOXA1 silencing on the level of IGFBP-2 in LNCaP cells. Cells were transfected with 50 nM FOXA1 siRNA for 72 hours using Saint Red transfection reagent. Non-silencing siRNA was used as a negative control (for knock down experiment). FOXA1 and IGFBP-2 abundance were assessed by western blot. Graphs shows efficient FOXA1 knock down and the intensity of IGFBP-2 normalized to lamin and expressed as relative fold change. (NS: Non silencing siRNA) ( $n = 2$ ).

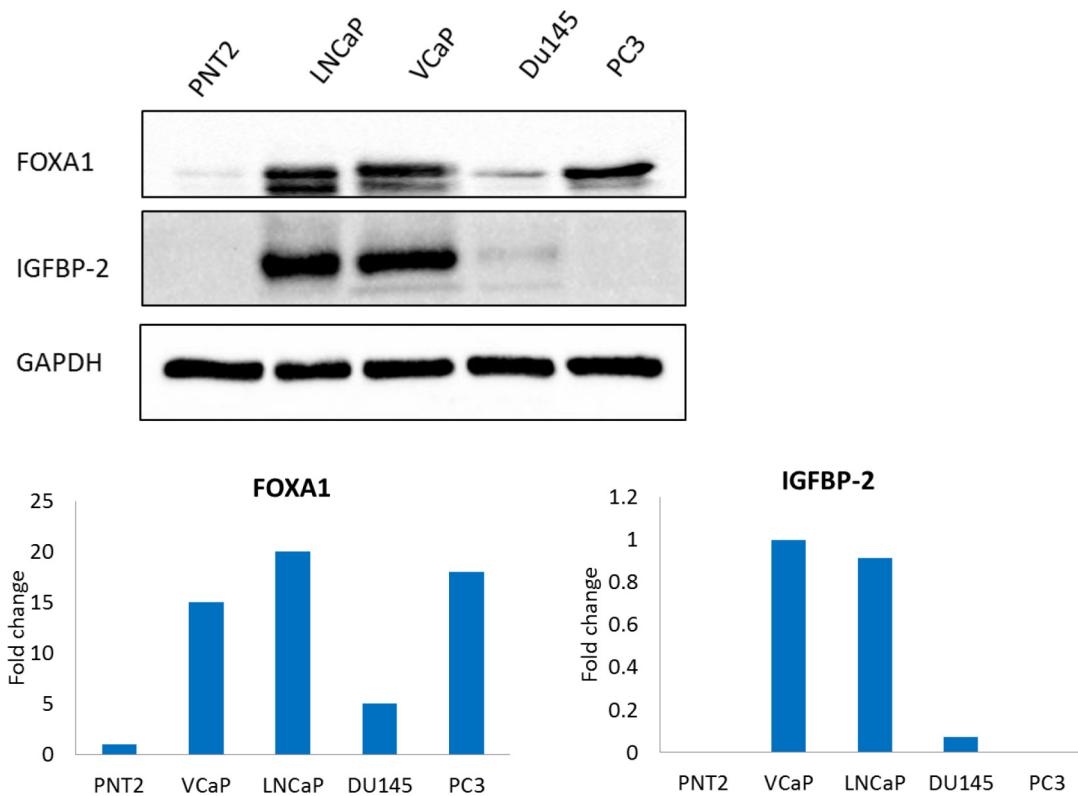

**Supplementary Figure 2: The differential abundance of FOXA1 and IGFBP-2 in prostate epithelial cells.** Western blot showing FOXA1 and IGFBP-2 protein levels in a panel of prostate cell lines. Prostate cell line: PNT2, LNCaP, VCaP, DU145 and PC-3 cell lines were extracted as whole cell lysates after the cells were 80% confluence in the flask in 25 mM glucose GM. Western blotting was performed to assess the abundance of the total amount of FOXA1 and IGFBP-2. GAPDH acted as a loading control. Quantified fold changes relative to PNT2 cells (for FOXA1 level) and VCaP cells (for IGFBP-2 level) are shown in the graph below the blots. ( $n = 1$ )
